# Supplementary material
Source: publisher site journal article supplement (https://www.dovepress.com/article/252060)
Supplement: Supplementary file 1 [file get_supplementary_file.php]

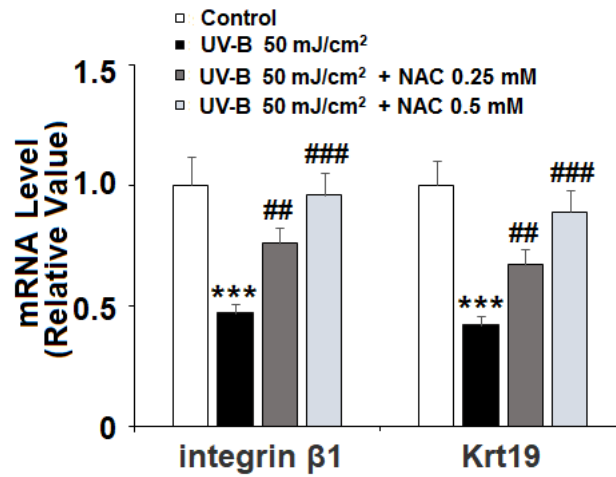

**Supplementary Figure 1.** N-acetyl-L-cysteine (NAC) prevented ultraviolet-B (UV-B) exposure-induced impairment in the capacities of ESCs. Cells were exposed to UV-B (50 mJ/cm<sup>2</sup>) with or without NAC (0.25, and 0.5 mM) for 24 h. mRNA of *integrin  $\beta$ 1* and *Krt19* was measured by real-time PCR analysis (\*\*\*, P<0.001 vs. vehicle control; ##, ###, P<0.01, 0.001 vs. UV-B group, n=4).
